# Supplementary material
Source: PubMed Central journal article supplement (PMC8020149)
Supplement: mmc1.pdf [file mmc1.pdf]

**Appendix to “Preterm care during the COVID-19 pandemic: a comparative risk analysis of neonatal deaths averted by kangaroo mother care versus mortality due to SARS-CoV-2 infection”**

**Table S1. Grouping of countries by region**

| Africa                          |                              | Europe                     | Latin America and Caribbean |
|---------------------------------|------------------------------|----------------------------|-----------------------------|
| Algeria                         | Democratic Republic of Congo | Albania                    | Belize                      |
| Egypt                           | Equatorial Guinea            | Belarus                    | Costa Rica                  |
| Morocco                         | Gabon                        | Bosnia and Herzegovina     | El Salvador                 |
| Sudan                           | São Tomé and Príncipe        | Bulgaria                   | Guatemala                   |
| Tunisia                         | Burundi                      | Montenegro                 | Honduras                    |
| Benin                           | Comoros                      | Moldova (Republic of)      | Mexico                      |
| Burkina Faso                    | Djibouti                     | North Macedonia*           | Nicaragua                   |
| Cabo Verde                      | Eritrea                      | Romania                    | Panama                      |
| Côte d'Ivoire                   | Ethiopia                     | Serbia                     | Haiti                       |
| Gambia                          | Kenya                        | Ukraine                    | Cuba                        |
| Ghana                           | Madagascar                   |                            | Dominican Republic          |
| Guinea                          | Malawi                       |                            | Jamaica                     |
| Guinea-Bissau                   | Mauritius                    |                            | Saint Lucia                 |
| Liberia                         | Mozambique                   |                            | Guyana                      |
| Mali                            | Rwanda                       |                            | Suriname                    |
| Mauritania                      | Somalia                      |                            | Argentina                   |
| Niger                           | South Sudan                  |                            | Bolivia                     |
| Nigeria                         | Uganda                       |                            | Brazil                      |
| Senegal                         | United Republic of Tanzania  |                            | Colombia                    |
| Sierra Leone                    | Zambia                       |                            | Ecuador                     |
| Togo                            | Zimbabwe                     |                            | Paraguay                    |
| Angola                          | Botswana                     |                            | Peru                        |
| Cameroon                        | Lesotho                      |                            | Venezuela                   |
| Central African Republic        | Namibia                      |                            |                             |
| Chad                            | South Africa                 |                            |                             |
| Congo                           | Swaziland                    |                            |                             |
| Asia (excluding Southeast Asia) |                              | Oceania and Southeast Asia |                             |
| Armenia                         | Yemen                        | Cambodia                   | Solomon Islands             |
| Azerbaijan                      | Afghanistan                  | Indonesia                  | Timor-Leste                 |
| Georgia                         | Bangladesh                   | Lao <sup>†</sup>           | Tonga                       |
| Jordan                          | Bhutan                       | Malaysia                   | Vanuatu                     |
| Iran (Islamic Republic of)      | India                        | Myanmar                    |                             |
| Iraq                            | Maldives                     | Philippines                |                             |
| Kazakhstan                      | Nepal                        | Thailand                   |                             |
| Kyrgyzstan                      | Pakistan                     | Viet Nam                   |                             |
| Syrian Arab Republic            | Sri Lanka                    | Fiji                       |                             |
| Tajikistan                      | China                        | Kiribati                   |                             |
| Turkey                          | Korea <sup>^</sup>           | Micronesia <sup>‡</sup>    |                             |
| Turkmenistan                    | Mongolia                     | Papua New Guinea           |                             |
| Uzbekistan                      |                              | Samoa                      |                             |

\*Republic of North Macedonia. ^Democratic People's Republic of Korea. †Lao People's Democratic Republic. ‡Federated States of Micronesia.

**Table S2. National data sources**

| Country                               | Facility birth proportion | Low birthweight prevalence                                                                                    |
|---------------------------------------|---------------------------|---------------------------------------------------------------------------------------------------------------|
| Afghanistan                           | DHS 2015                  | No input data                                                                                                 |
| Albania                               | DHS 2017-2018             | DHS 2008; MICS 2000, 2005; National Statistical Office 2000-2010; General Directory of Civil Status 2012-2015 |
| Algeria                               | MICS 2012                 | MICS 2012                                                                                                     |
| Angola                                | DHS 2015                  | MICS 2001                                                                                                     |
| Argentina                             | MICS 2011                 | National Statistical Office 2000-2015                                                                         |
| Armenia                               | DHS 2015-2016             | DHS 2000, 2005, 2010, 2015; Ministry of Health 2000-2015                                                      |
| Azerbaijan                            | DHS 2016                  | DHS 2006; National Statistical Office 2000-2013                                                               |
| Bangladesh                            | MICS 2019                 | MICS 2013                                                                                                     |
| Belarus                               | MICS 2012                 | MICS 2005, 2012; National Statistical Office 2000-2014                                                        |
| Belize                                | MICS 2015                 | MICS 2006                                                                                                     |
| Benin                                 | DHS 2017-2018             | DHS 2001, 2006, 2011, 2014                                                                                    |
| Bhutan                                | MICS 2010                 | MICS 2010                                                                                                     |
| Bolivia                               | DHS 2008                  | DHS 1998, 2003, 2008; MICS 2000                                                                               |
| Bosnia and Herzegovina                | MICS 2011                 | MICS 2006, 2011                                                                                               |
| Botswana                              | Family Health Survey 2007 | National Statistical Office 2000-2010                                                                         |
| Brazil                                | PHDS 2006                 | Ministry of Health 2000-2014; SINASC 2015                                                                     |
| Bulgaria                              | No household data         | National Statistical Office 2000-2015                                                                         |
| Burkina Faso                          | DHS 2010                  | MICS 2006; DHS 2010; National Statistical Office 2011-2015                                                    |
| Burundi                               | DHS 2016                  | MICS 2000; DHS 2010                                                                                           |
| Cabo Verde                            | DHS 2005                  | No input data                                                                                                 |
| Cambodia                              | DHS 2014                  | DHS 2005, 2010, 2014                                                                                          |
| Cameroon                              | MICS 2014                 | DHS 1998, 2004; MICS 2000, 2006, 2014                                                                         |
| Central African Republic              | MICS 2010                 | MICS 2000, 2006, 2010                                                                                         |
| Chad                                  | DHS 2014                  | No input data                                                                                                 |
| China                                 | No household data         | Survey 2008, 2013                                                                                             |
| Colombia                              | DHS 2015                  | DHS 2000, 2005, 2010, 2015; National Statistical Office 2000-2015                                             |
| Comoros                               | DHS 2012                  | MICS 2000; DHS 2012                                                                                           |
| Congo                                 | MICS 2014                 | DHS 2005, 2011                                                                                                |
| Costa Rica                            | MICS 2011                 | MICS 2011; National Statistical Office 2001, 2003-2015                                                        |
| Cuba                                  | MICS 2014                 | MICS 2014; National Statistical Office 2000-2015                                                              |
| Côte d'Ivoire                         | MICS 2016                 | DHS 1998, 2011; MICS 2000, 2006                                                                               |
| Democratic People's Republic of Korea | MICS 2017                 | No input data                                                                                                 |
| Democratic Republic of the Congo      | DHS 2013                  | MICS 2001, 2010; DHS 2007, 2013                                                                               |
| Djibouti                              | MICS 2006                 | No input data                                                                                                 |
| Dominican Republic                    | MICS 2014                 | DHS 1999, 2002, 2007, 2013; MICS 2000, 2014                                                                   |
| Ecuador                               | NSS 2012                  | National Statistical Office 2009-2015                                                                         |
| Egypt                                 | DHS 2014                  | No input data                                                                                                 |
| El Salvador                           | MICS 2014                 | MICS 2014; National Statistical Office 2009-2015                                                              |
| Equatorial Guinea                     | DHS 2011                  | No input data                                                                                                 |
| Eritrea                               | DHS 2002                  | No input data                                                                                                 |
| Ethiopia                              | DHS 2016                  | No input data                                                                                                 |
| Fiji                                  | No household data         | No input data                                                                                                 |
| Gabon                                 | DHS 2012                  | DHS 2000, 2012                                                                                                |
| Gambia                                | MICS 2018                 | DHS 2013                                                                                                      |

| Country                          | Facility birth proportion | Low birthweight prevalence                                             |
|----------------------------------|---------------------------|------------------------------------------------------------------------|
| Georgia                          | MICS 2018                 | MICS 2005; National Statistical Office 2000-2015                       |
| Ghana                            | DHS 2014                  | MICS 2006, 2011; DHS 2008, 2014                                        |
| Guatemala                        | DHS 2014                  | DHS 1999, 2015; National Statistical Office 2009-2015                  |
| Guinea                           | DHS 2018                  | No input data                                                          |
| Guinea-Bissau                    | MICS 2014                 | MICS 2006, 2014                                                        |
| Guyana                           | MICS 2014                 | MICS 2000, 2006, 2014; DHS 2009                                        |
| Haiti                            | DHS 2016                  | No input data                                                          |
| Honduras                         | DHS 2011                  | DHS 2005, 2011                                                         |
| India                            | DHS 2015                  | National Family Health Survey 2005-2006, 2015-2016†                    |
| Indonesia                        | DHS 2012                  | DHS 1997, 2002, 2007, 2012                                             |
| Iran (Islamic Republic of)       | No household data         | No input data                                                          |
| Iraq                             | MICS 2018                 | No input data                                                          |
| Jamaica                          | MICS 2011                 | MICS 2005, 2011; Ministry of Health 2005                               |
| Jordan                           | PFHS 2017-2018            | DHS 1997, 2002, 2007, 2009, 2012                                       |
| Kazakhstan                       | MICS 2015                 | DHS 1999; MICS 2006, 2010, 2015; National Statistical Office 2000-2014 |
| Kenya                            | DHS 2014                  | DHS 1998, 2003, 2014                                                   |
| Kiribati                         | DHS 2009                  | No input data                                                          |
| Kyrgyzstan                       | MICS 2018                 | DHS 1997, 2012; MICS 2005, 2014; Ministry of Health 2004-2015          |
| Lao People's Democratic Republic | MICS 2017                 | MICS 2011                                                              |
| Lesotho                          | MICS 2018                 | MICS 2000; DHS 2004, 2009, 2014                                        |
| Liberia                          | DHS 2013                  | No input data                                                          |
| Madagascar                       | MDG Survey 2012           | DHS 1997, 2003, 2008; MICS 2000                                        |
| Malawi                           | DHS 2015                  | DHS 2000, 2004, 2010, 2016; MICS 2006, 2013                            |
| Malaysia                         | No household data         | Consultation 2001-2015                                                 |
| Maldives                         | DHS 2016-2017             | Ministry of Health 2007-2012; administrative data 2014                 |
| Mali                             | MICS 2015                 | No input data                                                          |
| Mauritania                       | MICS 2015                 | No input data                                                          |
| Mauritius                        | No household data         | National Statistical Office 2000-2015                                  |
| Mexico                           | MICS 2015                 | MICS 2015; National Statistical Office 2008-2015                       |
| Micronesia (Federated States of) | No household data         | No input data                                                          |
| Mongolia                         | MICS 2018                 | MICS 2000, 2005, 2010, 2014                                            |
| Montenegro                       | MICS 2018                 | MICS 2005, 2013; Institute of Public Health 2000-2015                  |
| Morocco                          | DHS 2003                  | DHS 2003                                                               |
| Mozambique                       | DHS 2015                  | DHS 1997, 2003, 2011                                                   |
| Myanmar                          | DHS 2015                  | DHS 2015                                                               |
| Namibia                          | DHS 2013                  | DHS 2000, 2006, 2013                                                   |
| Nepal                            | DHS 2016                  | DHS 2011, 2016; MICS 2014                                              |
| Nicaragua                        | RHS 2006                  | DHS 1998, 2001                                                         |
| Niger                            | DHS 2012                  | No input data                                                          |
| Nigeria                          | DHS 2018                  | No input data                                                          |
| Pakistan                         | DHS 2017-2018             | No input data                                                          |
| Panama                           | MICS 2013                 | MICS 2013; National Statistical Office 2000-2004, 2006-2015            |
| Papua New Guinea                 | DHS 2016-2018             | No input data                                                          |
| Paraguay                         | MICS 2016                 | MICS 2016; National Statistical Office 2014-2015                       |
| Peru                             | DHS 2016                  | DHS 2000, 2004, 2008-2012                                              |

| Country                     | Facility birth proportion | Low birthweight prevalence                                                                                           |
|-----------------------------|---------------------------|----------------------------------------------------------------------------------------------------------------------|
| Philippines                 | DHS 2017                  | DHS 1998, 2003, 2008, 2013                                                                                           |
| Republic of Moldova         | MICS 2012                 | DHS 2005; MICS 2012; National Statistical Office 2002-2015                                                           |
| Republic of North Macedonia | MICS 2011                 | MICS 2005, 2011; National Statistical Office 2000-2015                                                               |
| Romania                     | No household data         | National Statistical Office 2000-2015                                                                                |
| Rwanda                      | DHS 2014                  | DHS 2005, 2010, 2014                                                                                                 |
| Saint Lucia                 | MICS 2012                 | No input data                                                                                                        |
| Samoa                       | DHS 2009                  | No input data                                                                                                        |
| Senegal                     | DHS 2017                  | DHS 2005, 2010, 2012, 2014-2016                                                                                      |
| Serbia                      | MICS 2014                 | MICS 2005, 2010, 2014                                                                                                |
| Sierra Leone                | MICS 2017                 | DHS 2008, 2013; MICS 2010                                                                                            |
| Solomon Islands             | DHS 2006                  | No input data                                                                                                        |
| Somalia                     | MICS 2006                 | No input data                                                                                                        |
| South Africa                | DHS 2016                  | DHS 1998; HMIS 2005-2012, 2014                                                                                       |
| South Sudan                 | MICS 2010                 | No input data                                                                                                        |
| Sri Lanka                   | DHS 2016                  | Routine hospital-based information system 2001-2003, 2005-2015                                                       |
| Sudan                       | MICS 2014                 | No input data                                                                                                        |
| Suriname                    | MICS 2010                 | MICS 2000, 2006, 2010; National Statistical Office 2007-2008, 2011-2014                                              |
| Swaziland                   | MICS 2014                 | MICS 2000, 2010, 2014; DHS 2006                                                                                      |
| Syrian Arab Republic        | MICS 2006                 | No input data                                                                                                        |
| São Tomé and Príncipe       | MICS 2014                 | National Statistical Office 2012-2015                                                                                |
| Tajikistan                  | DHS 2017-2018             | MICS 2000, 2005; DHS 2012; National Statistical Office 2000-2014                                                     |
| Thailand                    | MICS 2015                 | MICS 2005, 2012; National Statistical Office 2001-2010; Ministry of Interior 2011; Health Information Unit 2012-2015 |
| Timor-Leste                 | DHS 2016                  | No input data                                                                                                        |
| Togo                        | DHS 2013                  | MICS 2000, 2006; DHS 2013                                                                                            |
| Tonga                       | DHS 2012                  | No input data                                                                                                        |
| Tunisia                     | MICS 2018                 | MICS 2011                                                                                                            |
| Turkey                      | DHS 2013                  | DHS 1998, 2003; Ministry of Health 2012, 2014-2015; National Statistical Office 2013                                 |
| Turkmenistan                | MICS 2015                 | MICS 2015; National Statistical Office 2002-2010; Ministry of Health 2011-2015                                       |
| Uganda                      | DHS 2016                  | No input data                                                                                                        |
| Ukraine                     | MICS 2012                 | MICS 2005, 2012; DHS 2007; National Statistical Office 2000-2013                                                     |
| United Republic of Tanzania | DHS 2015                  | DHS 1999, 2004, 2010, 2015                                                                                           |
| Uzbekistan                  | MICS 2006                 | MICS 2000, 2006; National Statistical Office 2000-2014                                                               |
| Vanuatu                     | DHS 2013                  | MICS 2007                                                                                                            |
| Venezuela                   | No household data         | National Statistical Office 2000-2015                                                                                |
| Viet Nam                    | MICS 2013-2014            | DHS 1997, 2002; MICS 2000, 2010, 2013                                                                                |
| Yemen                       | DHS 2013                  | No input data                                                                                                        |
| Zambia                      | DHS 2018                  | MICS 1999; DHS 2001, 2007, 2013                                                                                      |
| Zimbabwe                    | MICS 2019                 | DHS 1999, 2005, 2010, 2015; MICS 2006, 2014                                                                          |

†Only partial data were available for the most recent National Family Health Survey in India.

**Table S3. GATHER checklist of information that should be included in reports of global health estimates, with description of compliance and location of information for “Preterm care during the COVID-19 pandemic: a comparative risk analysis of neonatal deaths averted by kangaroo mother care versus mortality due to SARS-CoV-2 infection”**

| #                                                                                                     | GATHER checklist item                                                                                                                                                                                                                                                                                                                                                                     | Description of compliance                                                                                | Reference                                                                                                                                                                                                                                                                                                                                                                                                                                                                                                                                                                                                                                                                                            |
|-------------------------------------------------------------------------------------------------------|-------------------------------------------------------------------------------------------------------------------------------------------------------------------------------------------------------------------------------------------------------------------------------------------------------------------------------------------------------------------------------------------|----------------------------------------------------------------------------------------------------------|------------------------------------------------------------------------------------------------------------------------------------------------------------------------------------------------------------------------------------------------------------------------------------------------------------------------------------------------------------------------------------------------------------------------------------------------------------------------------------------------------------------------------------------------------------------------------------------------------------------------------------------------------------------------------------------------------|
| <b>Objectives and funding</b>                                                                         |                                                                                                                                                                                                                                                                                                                                                                                           |                                                                                                          |                                                                                                                                                                                                                                                                                                                                                                                                                                                                                                                                                                                                                                                                                                      |
| 1                                                                                                     | Define the indicator(s), populations (including age, sex, and geographic entities), and time period(s) for which estimates were made.                                                                                                                                                                                                                                                     | Narrative provided in paper describing indicators, definitions, populations, and time periods            | Main text (Methods)                                                                                                                                                                                                                                                                                                                                                                                                                                                                                                                                                                                                                                                                                  |
| 2                                                                                                     | List the funding sources for the work.                                                                                                                                                                                                                                                                                                                                                    | Funding sources listed in paper                                                                          | Summary (Funding)                                                                                                                                                                                                                                                                                                                                                                                                                                                                                                                                                                                                                                                                                    |
| <b>Data Inputs</b>                                                                                    |                                                                                                                                                                                                                                                                                                                                                                                           |                                                                                                          |                                                                                                                                                                                                                                                                                                                                                                                                                                                                                                                                                                                                                                                                                                      |
| <i>For all data inputs from multiple sources that are synthesized as part of the study:</i>           |                                                                                                                                                                                                                                                                                                                                                                                           |                                                                                                          |                                                                                                                                                                                                                                                                                                                                                                                                                                                                                                                                                                                                                                                                                                      |
| 3                                                                                                     | Describe how the data were identified and how the data were accessed.                                                                                                                                                                                                                                                                                                                     | Narrative description of data seeking methods provided in paper                                          | Main text (Methods)                                                                                                                                                                                                                                                                                                                                                                                                                                                                                                                                                                                                                                                                                  |
| 4                                                                                                     | Specify the inclusion and exclusion criteria. Identify all ad-hoc exclusions.                                                                                                                                                                                                                                                                                                             | Narrative about inclusion and exclusion criteria by data type provided in paper                          | Main text (Methods)                                                                                                                                                                                                                                                                                                                                                                                                                                                                                                                                                                                                                                                                                  |
| 5                                                                                                     | Provide information on all included data sources and their main characteristics. For each data source used, report reference information or contact name/institution, population represented, data collection method, year(s) of data collection, sex and age range, diagnostic criteria or measurement method, and sample size, as relevant.                                             | Narrative description and list of all data sources provided in submission materials                      | Main text (Methods), Appendix (pg 2-4), online data sources                                                                                                                                                                                                                                                                                                                                                                                                                                                                                                                                                                                                                                          |
| 6                                                                                                     | Identify and describe any categories of input data that have potentially important biases (e.g., based on characteristics listed in item 5).                                                                                                                                                                                                                                              | Summary of known biases included in paper                                                                | Main text (Methods)                                                                                                                                                                                                                                                                                                                                                                                                                                                                                                                                                                                                                                                                                  |
| <i>For data inputs that contribute to the analysis but were not synthesized as part of the study:</i> |                                                                                                                                                                                                                                                                                                                                                                                           |                                                                                                          |                                                                                                                                                                                                                                                                                                                                                                                                                                                                                                                                                                                                                                                                                                      |
| 7                                                                                                     | Describe and give sources for any other data inputs.                                                                                                                                                                                                                                                                                                                                      | Narrative description and sources for other data inputs provided in submission materials                 | Main text (Methods), online data sources                                                                                                                                                                                                                                                                                                                                                                                                                                                                                                                                                                                                                                                             |
| <i>For all data inputs:</i>                                                                           |                                                                                                                                                                                                                                                                                                                                                                                           |                                                                                                          |                                                                                                                                                                                                                                                                                                                                                                                                                                                                                                                                                                                                                                                                                                      |
| 8                                                                                                     | Provide all data inputs in a file format from which data can be efficiently extracted (e.g., a spreadsheet rather than a PDF), including all relevant meta-data listed in item 5. For any data inputs that cannot be shared because of ethical or legal reasons, such as third-party ownership, provide a contact name or the name of the institution that retains the right to the data. | Downloads of input data are available through online data sources                                        | Online data sources:<br><a href="https://www.livessavedtool.org">https://www.livessavedtool.org</a> ;<br><a href="https://www.who.int/healthinfo/global_burden_disease/estimates/en/index2.html">https://www.who.int/healthinfo/global_burden_disease/estimates/en/index2.html</a> ;<br><a href="https://data.unicef.org/resources/unicef-who-low-birthweight-estimates-levels-and-trends-2000-2015">https://data.unicef.org/resources/unicef-who-low-birthweight-estimates-levels-and-trends-2000-2015</a> ;<br><a href="https://cgf.cochrane.org/news/covid-19-coronavirus-disease-fertility-and-pregnancy">https://cgf.cochrane.org/news/covid-19-coronavirus-disease-fertility-and-pregnancy</a> |
| <b>Data analysis</b>                                                                                  |                                                                                                                                                                                                                                                                                                                                                                                           |                                                                                                          |                                                                                                                                                                                                                                                                                                                                                                                                                                                                                                                                                                                                                                                                                                      |
| 9                                                                                                     | Provide a conceptual overview of the data analysis method. A diagram may be helpful.                                                                                                                                                                                                                                                                                                      | Overview of overall methodological process and description of the process is provided                    | Main text (Methods)                                                                                                                                                                                                                                                                                                                                                                                                                                                                                                                                                                                                                                                                                  |
| 10                                                                                                    | Provide a detailed description of all steps of the analysis, including mathematical formulae. This description should cover, as relevant, data cleaning, data pre-processing, data adjustments and weighting of data sources, and mathematical or statistical model(s).                                                                                                                   | Detailed description of all steps of analysis, including mathematical formulae, is provided in the paper | Main text (Methods)                                                                                                                                                                                                                                                                                                                                                                                                                                                                                                                                                                                                                                                                                  |
| 11                                                                                                    | Describe how candidate models were evaluated and how the final model(s) were selected.                                                                                                                                                                                                                                                                                                    | Provided in the paper                                                                                    | Main text (Methods)                                                                                                                                                                                                                                                                                                                                                                                                                                                                                                                                                                                                                                                                                  |

|                               |                                                                                                                                                                  |                                                                                                                                       |                                                                                        |
|-------------------------------|------------------------------------------------------------------------------------------------------------------------------------------------------------------|---------------------------------------------------------------------------------------------------------------------------------------|----------------------------------------------------------------------------------------|
| 12                            | Provide the results of an evaluation of model performance, if done, as well as the results of any relevant sensitivity analysis.                                 | Provided in the paper                                                                                                                 | Main text (Results)                                                                    |
| 13                            | Describe methods for calculating uncertainty of the estimates. State which sources of uncertainty were, and were not, accounted for in the uncertainty analysis. | Provided in the paper                                                                                                                 | Main text (Methods)                                                                    |
| 14                            | State how analytic or statistical source code used to generate estimates can be accessed.                                                                        | Access statement provided                                                                                                             | Statistical source code used to generate estimates will be made available upon request |
| <b>Results and Discussion</b> |                                                                                                                                                                  |                                                                                                                                       |                                                                                        |
| 15                            | Provide published estimates in a file format from which data can be efficiently extracted.                                                                       | Included in the paper; electronic file is not provided given only a few reported estimates (5 world regions and a single time period) | Main text (Results)                                                                    |
| 16                            | Report a quantitative measure of the uncertainty of the estimates (e.g., uncertainty intervals).                                                                 | Uncertainty intervals are provided with all results                                                                                   | Main text (Results)                                                                    |
| 17                            | Interpret results in light of existing evidence. If updating a previous set of estimates, describe the reasons for changes in estimates.                         | Interpretation of results in light of existing evidence is provided in the narrative of paper                                         | Main text (Research in Context and Discussion)                                         |
| 18                            | Discuss limitations of the estimates. Include a discussion of any modelling assumptions or data limitations that affect interpretation of the estimates.         | Discussion of limitations is provided in the narrative of paper                                                                       | Main text (Discussion)                                                                 |
